# Supplementary material
Source: Springer Nature journal article supplement (https://www.springermedizin.de/resource/supplementary/12943_2014_1402_MOESM1_ESM.pdf/9552922)

**A**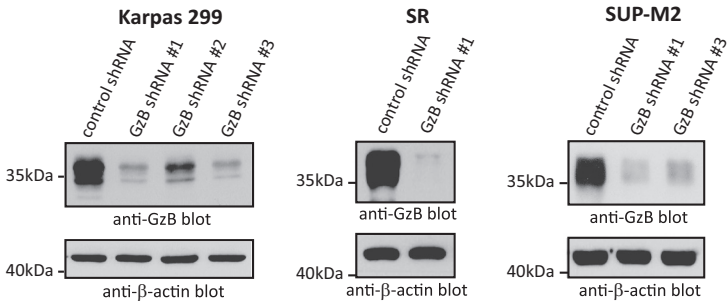**B**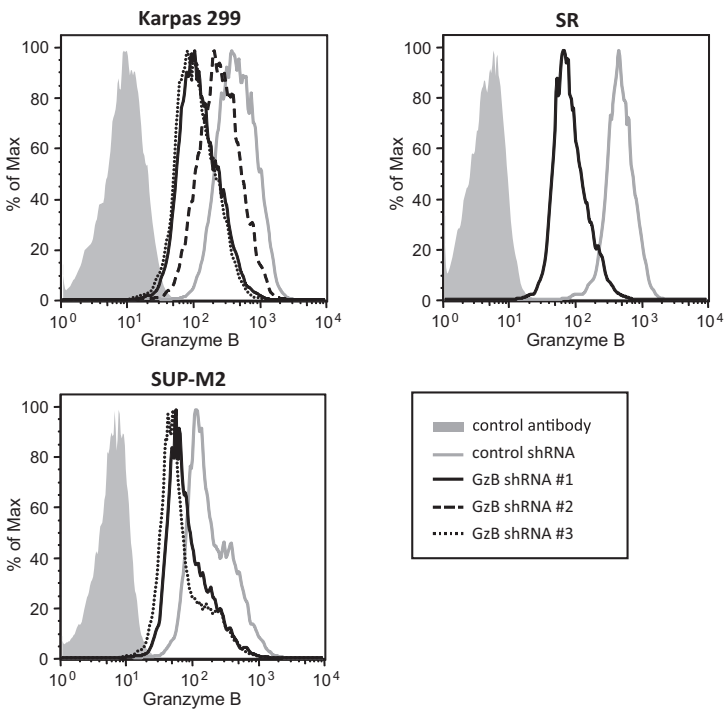

Supplement: MOESM1 [file 9552922]
